# Supplementary material for: Palmitate and glucose increase amyloid precursor protein in extracellular vesicles: Missing link between metabolic syndrome and Alzheimer's disease
Source: PubMed Central journal article supplement — J Extracell Vesicles. 2023 Oct 28;12(11):12340. doi: 10.1002/jev2.12340 (PMC10613125; doi:10.1002/jev2.12340), 2023-10-28
Supplement: JEV2-12-12340-s001.pdf [file JEV2-12-12340-s001.pdf]

## SUPPLEMENTARY FOR

### **Palmitate and glucose increase extracellular vesicle amyloid precursor protein: Missing link between metabolic syndrome and Alzheimer's disease**

Bhumsoo Kim<sup>1,2</sup>, Yoon-Tae Kang<sup>3</sup>, Faye E Mendelson<sup>1,2</sup>, John M Hayes<sup>1,2</sup>, Masha G Savelieff<sup>2</sup>, Sunitha Nagrath<sup>3</sup>, Eva L Feldman<sup>1,2,\*</sup>

<sup>1</sup> Department of Neurology, University of Michigan, Ann Arbor, MI, 48109

<sup>2</sup> NeuroNetwork for Emerging Therapies, University of Michigan, Ann Arbor, MI, 48109

<sup>3</sup> Department of Chemical Engineering and Biointerface Institute, University of Michigan, Ann Arbor, MI 48109

\*Corresponding author, e-mail: [efeldman@umich.edu](mailto:efeldman@umich.edu)

### Supplementary Data 1. Differentiated HK-532 express neuronal markers.

We examined NeuN (Wolf, Buslei et al. 1996, Gusel'nikova and Korzhevskiy 2015) and synaptophysin (Wiedenmann, Franke et al. 1986, Smith, Nikulasson et al. 1993) expression as the differentiated neuronal markers by immunohistochemistry. Differentiating HK-532 cells for 1 wk in NSDM (differentiation media) greatly increased NeuN and synaptophysin expression, suggesting fully differentiated neurons (**Supplementary Figure S1; below**).

*Method:* Differentiated and undifferentiated HK-532 cells were plated onto glass cover slides coated with poly-L-lysine (catalog # P4832, Sigma, St Louis, MO) and fixed in 4% paraformaldehyde for 15 min. Cells were rinsed 3 times with wash buffer (PBS with 0.1 % Triton X-100). Cells were then incubated with anti-NeuN (1:500; catalog # 104225, Abcam, Cambridge, UK) or anti-synaptophysin (1:200; catalog # 101006, Synaptic System, Goettingen, Germany) antibodies for 16 h. Cells were then rinsed and incubated in AlexaFluor 405 anti-rabbit (for NeuN; catalog # A48258, Invitrogen, Thermo Fisher Scientific, Waltham, MA) or AlexaFluor 594 anti-chicken (for synaptophysin; catalog # A11042, Invitrogen) secondary antibodies for 2 h. Cells were mounted on slide glass with ProLong gold with DAPI (Invitrogen) and images were taken on a Leica Stellaris 8 Lightning confocal using a 1.4 numerical aperture Plan-APO 63x oil objective. Images were rendered with the lightning deconvolution feature and were exported as tiffs (Elzinga, Henn et al. 2022).

**Supplementary Figure S1. Differentiated HK-532 express neuronal markers.** HK-532 cells were stained for NeuN (green channel) or synaptophysin (purple channel) along with DAPI (blue channel).

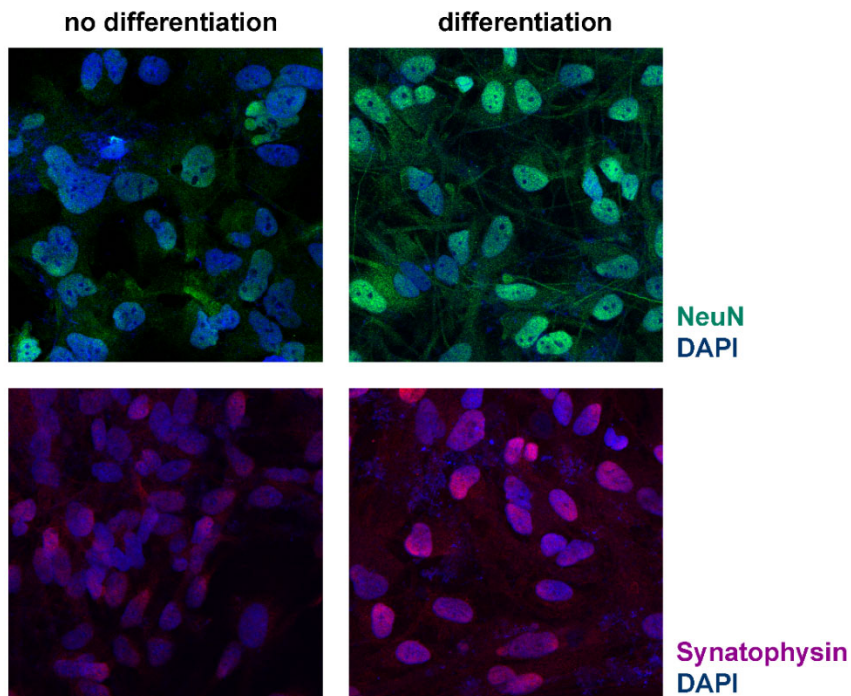

### Supplementary Data 2. HOG cells express oligodendrocyte markers.

We examined myelin oligodendrocyte glycoprotein (MOG) and 2',3'-cyclic-nucleotide 3'-phosphodiesterase (CNPase) as mature human oligodendrocyte (HOG) markers and platelet-derived growth factor receptor (PDGFR) as an undifferentiated oligodendrocyte progenitor cell (OPC) marker (Kuhn, Gritti et al. 2019). Cells were differentiated with a combination of T3, selenium, insulin, and transferrin for 3 and 5 days. HOG cells already expressed MOG and CNPase before the differentiation protocol, which did not further alter protein levels (**Supplementary Figure S2; below**). PDGFR was not detected in any condition. These results suggest that HOG cells already represent mature oligodendrocytes characteristics.

*Method:* HOG cells were differentiated in DMEM with 30 nM 3,3',5-triiodo-L-thyronine sodium salt (T3, catalog # T6397, Sigma), 30 nM selenium (catalog # S5261, Sigma), 50 µg/ml transferrin (catalog # 3188-AT-001G, R&D Systems, Minneapolis, MN), 0.5 µg/ml insulin (catalog # I0516, Sigma) and 0.05% fetal bovine serum. Western blotting was performed as in Materials and Methods using anti-MOG (catalog # MAB2439, R&D Systems), anti-CNPase (catalog # 66729-1-Ig, Proteintech, Rosemont, IL) or anti-PDGFR (catalog # ab134123, Abcam) antibodies.

**Supplementary Figure S2. HOG cells express oligodendrocyte markers.** HOG cells were differentiated for 0-5 days and cell lysates were analyzed for MOG, CNPase, PDGFR, and tubulin. HOG cells expressed MOG and CNPase prior to differentiation, which did not further alter protein levels.

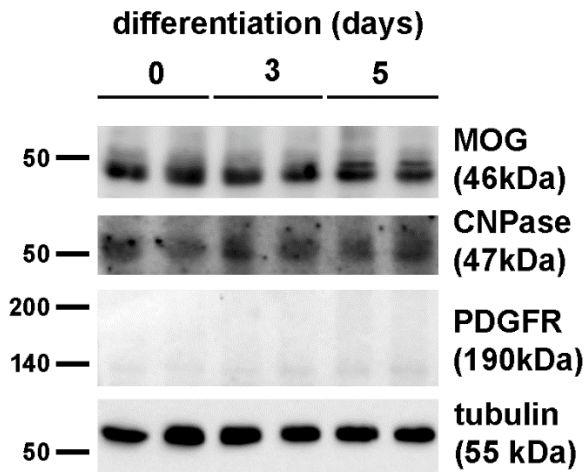

### Supplementary Figure S3. Palmitate increases EV secretion from neurons and oligodendrocytes.

HK-532 cells and human oligodendrocytes (HOG) were treated with control (ctl, white; bovine serum albumin vehicle) and palmitate (pal, grey; 150  $\mu$ M) conditions for 48 h. EVs were obtained and the same amount of protein in all conditions (control-treated HK-532, palmitate treated HK-532, control-treated HOG, palmitate treated HOG) were resolved by gel electrophoresis and blotted for EV proteins Alix and TSG101 (main text Fig 4D-E). Intensity of Alix and TSG101 bands were quantified directly from the blots; since equal amounts of protein were loaded, band intensity is internally normalized and relative to total loaded protein. Palmitate increased EVs, i.e., levels of Alix and TSG101, in both (A) HK-532 and (B) HOG cells. Data are presented as mean  $\pm$  SEM from 3 separate experiments with duplicate treatments. \*\*P<0.01, \*\*\*P<0.001, \*\*\*\*P<0.0001, by Student's t-test.

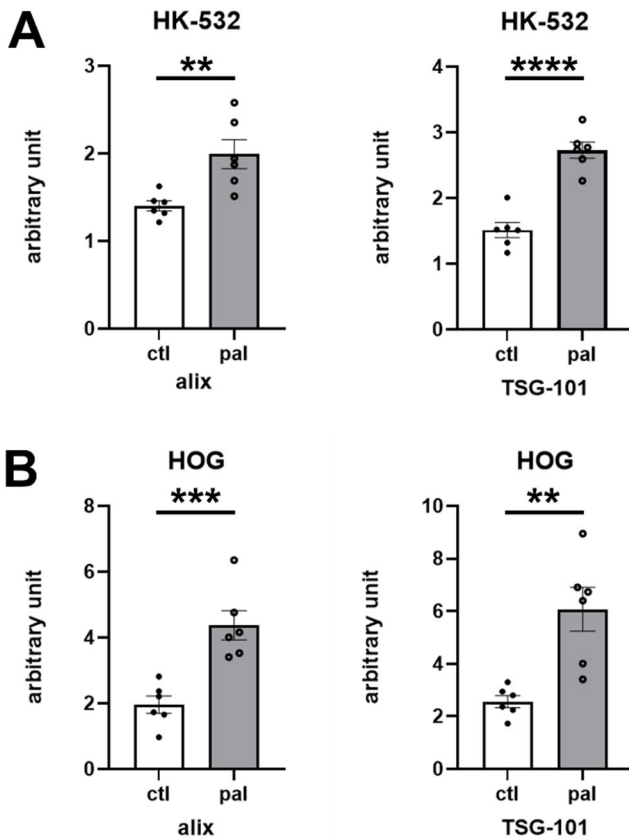

**Supplementary Table S1. List of antibodies.**

| <b>Antibodies</b>         | <b>Company</b> | <b>Catalog #</b> | <b>Description</b>                | <b>RRID</b> |
|---------------------------|----------------|------------------|-----------------------------------|-------------|
| pAPP                      | CST            | 6986             | Rabbit monoclonal (D90B8)         | AB_10831197 |
| APP                       | Millipore      | MAB348           | Mouse monoclonal (22c11)          | AB_94882    |
| APP-CTF                   | BioLegend      | 825001           | Rabbit polyclonal                 | AB_2564886  |
| pTau,<br>pSer199/Ser202   | Invitrogen     | 44-768G          | Rabbit polyclonal                 | AB_1502103  |
| pTau, pThr231             | Invitrogen     | 44-746G          | Rabbit polyclonal                 | AB_1502124  |
| pTau, pSer396             | Abcam          | ab109390         | Rabbit monoclonal (EPR2731)       | AB_10860822 |
| Tau5                      | Invitrogen     | AHB0042          | Mouse monoclonal (TAU-5)          | AB_1502093  |
| BACE                      | Abcam          | ab108394         | Rabbit monoclonal (EPR3956)       | AB_10861218 |
| pIRS-1, pSer612           | CST            | 3203             | Rabbit monoclonal (C15H5)         | AB_1031167  |
| pIRS-1,<br>pSer636/Ser639 | CST            | 2388             | Rabbit polyclonal                 | AB_330339   |
| pAkt, pSer473             | CST            | 4060             | Rabbit monoclonal (D9E)           | AB_2315049  |
| Akt, pan                  | CST            | 4691             | Rabbit monoclonal (C67E7)         | AB_915783   |
| pERK,<br>pThr202/Tyr204   | CST            | 9101             | Rabbit polyclonal                 | AB_331646   |
| ERK                       | CST            | 9102             | Rabbit polyclonal                 | AB_330744   |
| pJNK,<br>pThr183/Tyr185   | CST            | 4668             | Rabbit monoclonal (81E11)         | AB_823588   |
| TSG101                    | Abcam          | ab125011         | Rabbit monoclonal<br>[EPR7130(B)] | AB_10974262 |
| Flotillin-1               | CST            | 18634            | Rabbit monoclonal (D2V7J)         | AB_2773040  |
| Alix                      | CST            | 2171             | Mouse monoclonal (3A9)            | AB_2299455  |
| VDAC                      | CST            | 4661             | Rabbit monoclonal (D73D12)        | AB_10557420 |
| Calnexin                  | CST            | 2679             | Rabbit monoclonal (C5C9)          | AB_2228381  |
| $\beta$ -Actin            | Abcam          | ab8227           | Rabbit polyclonal                 | AB_2305186  |
| Tubulin                   | CST            | 3873             | Mouse monoclonal (DM1A)           | AB_1904178  |

Abcam, Cambridge, UK; BioLegend, San Diego, CA; CST, Cell Signaling Technology, Danvers, MA; Invitrogen, Thermo Fisher Scientific, Waltham, MA; Millipore, Merck, Burlington, MA.

## REFERENCES

- Elzinga, S. E., R. Henn, B. J. Murdock, B. Kim, J. M. Hayes, F. Mendelson, I. Webber-Davis, S. Teener, C. Pacut, S. I. Lentz and E. L. Feldman (2022). "cGAS/STING and innate brain inflammation following acute high-fat feeding." Front Immunol **13**: 1012594.
- Gusel'nikova, V. V. and D. E. Korzhevskiy (2015). "NeuN As a Neuronal Nuclear Antigen and Neuron Differentiation Marker." Acta Naturae **7**(2): 42-47.
- Kuhn, S., L. Gritti, D. Crooks and Y. Dombrowski (2019). "Oligodendrocytes in Development, Myelin Generation and Beyond." Cells **8**(11).
- Smith, T. W., S. Nikulasson, U. De Girolami and L. J. De Gennaro (1993). "Immunohistochemistry of synapsin I and synaptophysin in human nervous system and neuroendocrine tumors. Applications in diagnostic neuro-oncology." Clin Neuropathol **12**(6): 335-342.
- Wiedenmann, B., W. W. Franke, C. Kuhn, R. Moll and V. E. Gould (1986). "Synaptophysin: a marker protein for neuroendocrine cells and neoplasms." Proc Natl Acad Sci U S A **83**(10): 3500-3504.
- Wolf, H. K., R. Buslei, R. Schmidt-Kastner, P. K. Schmidt-Kastner, T. Pietsch, O. D. Wiestler and I. Blumcke (1996). "NeuN: a useful neuronal marker for diagnostic histopathology." J Histochem Cytochem **44**(10): 1167-1171.
